# Supplementary material for: Assessing the impacts of 1.5 °C global warming – simulation protocol of the Inter-Sectoral Impact Model Intercomparison Project (ISIMIP2b)
Source: Copernicus journal article supplement (doi:10.5194/gmd-2016-229), 2016-10-20
Supplement: Supplementary file 1 [file gmd-2016-229-supplement.pdf]

## Supporting Online Material for:

### **Assessing the impacts of 1.5°C global warming – simulation protocol of the Inter-Sectoral Impact Model Intercomparison Project (ISIMIP2b)**

Katja Frieler, Richard Betts, Eleanor Burke, Philippe Ciais, Sebastien Denvil, Delphine Deryng, Kristie Ebi, Tyler Eddy, Kerry Emanuel, Joshua Elliott, Eric Galbraith, Simon N. Gosling, Kate Halladay, Fred Hattermann, Thomas Hickler, Jochen Hinkel, Veronika Huber, Chris Jones, Valentina Krysanova, Stefan Lange, Heike K. Lotze, Hermann Lotze-Campen, Matthias Mengel, Ioanna Mouratiadou, Hannes Müller Schmied, Ioanna Mouratiadou, Sebastian Ostberg, Franziska Piontek, Alexander Popp, Christopher P.O. Reyer, Jacob Schewe, Miodrag Stevanovic, Tatsuo Suzuki, Kirsten Thonicke, Hanqin Tian, Derek P. Tittensor, Robert Vautard, Michelle van Vliet, Lila Warszawski, Fang Zhao

# 1 Output data

The variable names only consist of lower-case letters. Please make sure that you do not use capital letters in the variable and file names. There may be minor adjustments of the lists below that turn out to be helpful in the course of the project. Therefore a most up-to-date version of the simulation protocol will be provided at the ISIMIP website ([www.isimip.org](http://www.isimip.org)). Please refer to this latest version when starting your simulations.

If storage issues keep you from reporting daily data, please contact the ISIMIP team to discuss potential solutions.

## 1.1 Water (Global & Regional)

Note that variable names are chosen to comply, where feasible, with the ALMA convention ([www.lmd.jussieu.fr/~polcher/ALMA/convention\\_output\\_3.html](http://www.lmd.jussieu.fr/~polcher/ALMA/convention_output_3.html)) and the names used in WATCH/WaterMIP. .

All variables are to be reported as time-averages with the indicated resolution; do not report instantaneous values ('snapshots'). An exception is **maxdis**, which is the maximum daily-average discharge in a given month, to be reported on a monthly basis (see below).

**Table 1:** Output variables to be reported by water sector models. *Variables highlighted in orange are requested from both **global and regional** models; discharge at gauge level (highlighted in purple) is requested only from regional models; other variables are requested only from global models. Variables marked by \* are also relevant for the permafrost sector and also listed there.*

| Variable (long name)   | Variable name | Resolution          | Unit (NetCDF format)               | Comments                                                                                                                                                                        |
|------------------------|---------------|---------------------|------------------------------------|---------------------------------------------------------------------------------------------------------------------------------------------------------------------------------|
| Hydrological Variables |               |                     |                                    |                                                                                                                                                                                 |
| *Runoff                | qtot          | daily** (0.5°x0.5°) | kg m <sup>-2</sup> s <sup>-1</sup> | Total (surface + subsurface) runoff (qtot = qs + qsb).<br><br>**If daily resolution not possible, please provide monthly.<br><br>Please also deliver for the permafrost sector. |

|                                    |           |                                                                                       |                                  |                                                                                                                                                   |
|------------------------------------|-----------|---------------------------------------------------------------------------------------|----------------------------------|---------------------------------------------------------------------------------------------------------------------------------------------------|
| Surface runoff                     | qs        | monthly (0.5°x0.5°)                                                                   | $\text{kg m}^{-2} \text{s}^{-1}$ |                                                                                                                                                   |
| Subsurface runoff                  | qsb       | monthly (0.5°x0.5°)                                                                   | $\text{kg m}^{-2} \text{s}^{-1}$ |                                                                                                                                                   |
| Discharge (gridded)                | dis       | daily** (0.5°x0.5°)                                                                   | $\text{m}^3 \text{s}^{-1}$       | **if daily resolution not possible, please provide monthly                                                                                        |
| Discharge (gauge level)            | dis       | daily** (for gauge locations see <a href="http://www.isimip.org">www.isimip.org</a> ) | $\text{m}^3 \text{s}^{-1}$       | **if daily resolution not possible, please provide monthly                                                                                        |
| Monthly maximum of daily discharge | maxdis    | monthly (0.5°x0.5°)                                                                   | $\text{m}^3 \text{s}^{-1}$       | Reporting this variable is not mandatory, but desirable particularly if daily discharge data is unfeasible                                        |
| Monthly minimum of daily discharge | mindis    | monthly (0.5°x0.5°)                                                                   | $\text{m}^3 \text{s}^{-1}$       | Reporting this variable is not mandatory, but desirable particularly if daily discharge data is unfeasible                                        |
| Evapotranspiration                 | evap      | monthly (0.5°x0.5°)                                                                   | $\text{kg m}^{-2} \text{s}^{-1}$ | Sum of transpiration, evaporation, interception losses, and sublimation.                                                                          |
| Potential Evapotranspiration       | potevap   | monthly (0.5°x0.5°)                                                                   | $\text{kg m}^{-2} \text{s}^{-1}$ | As evap, but with all resistances set to zero, except the aerodynamic resistance.                                                                 |
| *Soil moisture                     | soilmoist | monthly (0.5°x0.5°)                                                                   | $\text{kg m}^{-2}$               | Please provide soil moisture for all depth layers (i.e. 3D-field), and indicate depth in m.<br><br>Please also deliver for the permafrost sector. |

|                                     |               |                     |                    |                                                                                                                                                                                                                                                                                                                                   |
|-------------------------------------|---------------|---------------------|--------------------|-----------------------------------------------------------------------------------------------------------------------------------------------------------------------------------------------------------------------------------------------------------------------------------------------------------------------------------|
| Soil moisture, root zone            | rootmoist     | monthly (0.5°x0.5°) | kg m <sup>-2</sup> | Total simulated soil moisture available for evapotranspiration. If simulated by the model. Please indicate the depth of the root zone for each vegetation type in your model                                                                                                                                                      |
| Frozen soil moisture for each layer | soilmoistfroz | monthly (0.5°x0.5°) | kg m <sup>-2</sup> | Water content of frozen soil This variable only for the purposes of the permafrost sector.                                                                                                                                                                                                                                        |
| *Temperature of Soil                | tsl           | daily** (0.5°x0.5°) | K                  | <p>Temperature of each soil layer. Reported as "missing" for grid cells occupied entirely by "sea". Also need depths in meters. Daily would be great, but otherwise monthly would work.</p> <p>This variable only for the purposes of the permafrost sector</p> <p>**if daily resolution not possible, please provide monthly</p> |
| *Snow depth                         | snd           | monthly (0.5°x0.5°) | m                  | <p>Grid cell mean depth of snowpack.</p> <p>This variable only for the purposes of the permafrost sector.</p>                                                                                                                                                                                                                     |
| *Snow water equivalent              | swe           | monthly (0.5°x0.5°) | kg m <sup>-2</sup> | <p>Total water mass of the snowpack (liquid or frozen), averaged over a grid cell.</p> <p>Please also deliver for the permafrost sector.</p>                                                                                                                                                                                      |

|                                                                                                                                                                                                                                                                                                                                                                                                                                                                                                                                                         |           |                     |                                    |                                                                                                                                                                                                                                                                              |
|---------------------------------------------------------------------------------------------------------------------------------------------------------------------------------------------------------------------------------------------------------------------------------------------------------------------------------------------------------------------------------------------------------------------------------------------------------------------------------------------------------------------------------------------------------|-----------|---------------------|------------------------------------|------------------------------------------------------------------------------------------------------------------------------------------------------------------------------------------------------------------------------------------------------------------------------|
| *Annual maximum daily thaw depth                                                                                                                                                                                                                                                                                                                                                                                                                                                                                                                        | thawdepth | yearly (0.5°x0.5°)  | m                                  | This should be calculated from daily thaw depths, which do not need to be submitted themselves.                                                                                                                                                                              |
| Rainfall                                                                                                                                                                                                                                                                                                                                                                                                                                                                                                                                                | rainf     | monthly (0.5°x0.5°) | kg m <sup>-2</sup> s <sup>-1</sup> | These variables are required for test purposes only. If you need to reduce output data volumes, please provide these variables only once, with the first (test) data set you submit, e.g. for the first decade of each experiment. NOTE: rainf + snowf = total precipitation |
| Snowfall                                                                                                                                                                                                                                                                                                                                                                                                                                                                                                                                                | snowf     | monthly (0.5°x0.5°) | kg m <sup>-2</sup> s <sup>-1</sup> |                                                                                                                                                                                                                                                                              |
| Water management variables (for models that consider water management/human impacts)                                                                                                                                                                                                                                                                                                                                                                                                                                                                    |           |                     |                                    |                                                                                                                                                                                                                                                                              |
| <b>NOTE:</b> Models that cannot separate different water use sectors may report the respective totals and include in the filenames the first letter of each sector included. E.g. combined potential water withdrawal in the irrigation and livestock sectors would be “p <i>il</i> ww”; combined actual water consumption in the irrigation, domestic, manufacturing, electricity, and livestock sectors would be “a <i>idme</i> luse” (see <a href="http://www.isimip.org">www.isimip.org</a> for the latest naming convention regarding file names). |           |                     |                                    |                                                                                                                                                                                                                                                                              |
| Irrigation water demand (=potential irrigation water Withdrawal)                                                                                                                                                                                                                                                                                                                                                                                                                                                                                        | pirrww    | monthly (0.5°x0.5°) | kg m <sup>-2</sup> s <sup>-1</sup> | Irrigation water withdrawal, assuming unlimited water supply                                                                                                                                                                                                                 |
| Actual irrigation water withdrawal                                                                                                                                                                                                                                                                                                                                                                                                                                                                                                                      | airrww    | monthly (0.5°x0.5°) | kg m <sup>-2</sup> s <sup>-1</sup> | Irrigation water withdrawal, taking water availability into account; please provide if computed                                                                                                                                                                              |
| Potential irrigation water consumption                                                                                                                                                                                                                                                                                                                                                                                                                                                                                                                  | pirruse   | monthly (0.5°x0.5°) | kg m <sup>-2</sup> s <sup>-1</sup> | Portion of withdrawal that is evapo-transpired, assuming unlimited water supply                                                                                                                                                                                              |

|                                                         |                |                     |                                    |                                                                                                                   |
|---------------------------------------------------------|----------------|---------------------|------------------------------------|-------------------------------------------------------------------------------------------------------------------|
| Actual irrigation water consumption                     | airruse        | monthly (0.5°x0.5°) | kg m <sup>-2</sup> s <sup>-1</sup> | Portion of withdrawal that is evapotranspired, taking water availability into account; if computed                |
| Actual green water consumption on irrigated cropland    | airrusegreen   | monthly (0.5°x0.5°) | kg m <sup>-2</sup> s <sup>-1</sup> | Actual evapotranspiration from rain water over irrigated cropland; if computed                                    |
| Potential green water consumption on irrigated cropland | pirrusegreen   | monthly (0.5°x0.5°) | kg m <sup>-2</sup> s <sup>-1</sup> | potential evapotranspiration from rain water over irrigated cropland; if computed and different from airrusegreen |
| Actual green water consumption on rainfed cropland      | arainfusegreen | monthly (0.5°x0.5°) | kg m <sup>-2</sup> s <sup>-1</sup> | actual evapotranspiration from rain water over rainfed cropland; if computed                                      |
| Actual domestic water withdrawal                        | adomww         | monthly (0.5°x0.5°) | kg m <sup>-2</sup> s <sup>-1</sup> | if computed                                                                                                       |
| Actual domestic water consumption                       | adomuse        | monthly (0.5°x0.5°) | kg m <sup>-2</sup> s <sup>-1</sup> | if computed                                                                                                       |
| Actual manufacturing water withdrawal                   | amanww         | monthly (0.5°x0.5°) | kg m <sup>-2</sup> s <sup>-1</sup> | if computed                                                                                                       |

|                                        |          |                                                             |                                  |                                                                                                                                                                                                                                                                                                                                                                    |
|----------------------------------------|----------|-------------------------------------------------------------|----------------------------------|--------------------------------------------------------------------------------------------------------------------------------------------------------------------------------------------------------------------------------------------------------------------------------------------------------------------------------------------------------------------|
| Actual Manufacturing water consumption | amanuse  | monthly (0.5°x0.5°)                                         | $\text{kg m}^{-2} \text{s}^{-1}$ | if computed                                                                                                                                                                                                                                                                                                                                                        |
| Actual electricity water withdrawal    | aelecww  | monthly (0.5°x0.5°)                                         | $\text{kg m}^{-2} \text{s}^{-1}$ | if computed                                                                                                                                                                                                                                                                                                                                                        |
| Actual electricity water consumption   | aelecuse | monthly (0.5°x0.5°)                                         | $\text{kg m}^{-2} \text{s}^{-1}$ | if computed                                                                                                                                                                                                                                                                                                                                                        |
| Actual livestock water withdrawal      | aliveww  | monthly (0.5°x0.5°)                                         | $\text{kg m}^{-2} \text{s}^{-1}$ | if computed                                                                                                                                                                                                                                                                                                                                                        |
| Actual livestock water consumption     | aliveuse | monthly (0.5°x0.5°)                                         | $\text{kg m}^{-2} \text{s}^{-1}$ | if computed                                                                                                                                                                                                                                                                                                                                                        |
| Static output                          |          |                                                             |                                  |                                                                                                                                                                                                                                                                                                                                                                    |
| Soil types                             | soil     | static (0.5°x0.5°)                                          |                                  | Soil types or texture classes as used by your model. Please include a description of each type or class, especially if these are different from the standard HSWD and GSWP3 soil types. Please also include a description of the parameters and values associated with these soil types (parameter values could be submitted as spatial fields where appropriate). |
| Leaf Area Index                        | lai      | static (0.5°x0.5°) or monthly (0.5°x0.5°) where appropriate |                                  | If used by, or computed by the model                                                                                                                                                                                                                                                                                                                               |

## 1.2 Biomes

**Table 2** Variables to be reported by biomes models. Variables marked by \* are also relevant for the permafrost sector and also listed there.

| long name                                                                   | units                              |                            | output variable name       | frequency | comment                                                                             |
|-----------------------------------------------------------------------------|------------------------------------|----------------------------|----------------------------|-----------|-------------------------------------------------------------------------------------|
| <b>Essential outputs</b>                                                    |                                    |                            |                            |           |                                                                                     |
| <b>Pools</b>                                                                |                                    |                            |                            |           |                                                                                     |
| *Carbon Mass in Vegetation biomass                                          | kg m <sup>-2</sup>                 | per pft and gridcell total | <b>cveg_&lt;pft&gt;</b>    | year      | Per PFT information is desirable but if not possible please provide grid cell total |
| *Carbon Mass in Litter Pool                                                 | kg m <sup>-2</sup>                 | per pft and gridcell total | <b>clitter_&lt;pft&gt;</b> | year      | Per PFT information is desirable but if not possible please provide grid cell total |
| *Carbon Mass in Soil Pool                                                   | kg m <sup>-2</sup>                 | per pft and gridcell total | <b>csoil_&lt;pft&gt;</b>   | year      | Per PFT information is desirable but if not possible please provide grid cell total |
| <b>Fluxes</b>                                                               |                                    |                            |                            |           |                                                                                     |
| *Carbon Mass Flux out of atmosphere due to Gross Primary Production on Land | kg m <sup>-2</sup> s <sup>-1</sup> | gridcell total             | <b>gpp</b>                 | mon (day) | essential                                                                           |
| *Carbon Mass Flux out of atmosphere due to Gross Primary Production on Land | kg m <sup>-2</sup> s <sup>-1</sup> | per pft                    | <b>gpp_&lt;pft&gt;</b>     | year      | desirable                                                                           |



|                                                                                                                                                                         |                                  |                |                        |           |                                                                                                                                                                                                                                          |
|-------------------------------------------------------------------------------------------------------------------------------------------------------------------------|----------------------------------|----------------|------------------------|-----------|------------------------------------------------------------------------------------------------------------------------------------------------------------------------------------------------------------------------------------------|
| *Carbon Mass Flux into atmosphere due to Autotrophic (Plant) Respiration on Land                                                                                        | $\text{kg m}^{-2} \text{s}^{-1}$ | gridcell total | <b>ra</b>              | mon (day) |                                                                                                                                                                                                                                          |
| *Carbon Mass Flux out of atmosphere due to Net Primary Production on Land                                                                                               | $\text{kg m}^{-2} \text{s}^{-1}$ | gridcell total | <b>npp</b>             | mon (day) | essential                                                                                                                                                                                                                                |
| *Carbon Mass Flux out of atmosphere due to Net Primary Production on Land                                                                                               | $\text{kg m}^{-2} \text{s}^{-1}$ | per pft        | <b>npp_&lt;pft&gt;</b> | year      | desirable                                                                                                                                                                                                                                |
| *Carbon Mass Flux into atmosphere due to Heterotrophic Respiration on Land                                                                                              | $\text{kg m}^{-2} \text{s}^{-1}$ | gridcell total | <b>rh</b>              | mon (day) |                                                                                                                                                                                                                                          |
| *Carbon Mass Flux into atmosphere due to total Carbon emissions from Fire                                                                                               | $\text{kg m}^{-2} \text{s}^{-1}$ | gridcell total | <b>fireint</b>         | mon (day) |                                                                                                                                                                                                                                          |
| *Carbon Mass Flux out of Atmosphere due to Net biome Production on Land (NBP) (please specify if $\text{NBP} \neq \text{NPP} + \text{HR} + \text{Fires}$ in your model) | $\text{kg m}^{-2} \text{s}^{-1}$ | gridcell total | <b>ecoatmflux</b>      | mon (day) | This is the net mass flux of carbon between land and atmosphere calculated as photosynthesis MINUS the sum of plant and soil respiration, carbon fluxes from fire, harvest, grazing and land use change. Positive flux is into the land. |
| Structure                                                                                                                                                               |                                  |                |                        |           |                                                                                                                                                                                                                                          |

|                                                  |                                  |                  |                        |                                |                                                                                                                                                                                                                                                                  |
|--------------------------------------------------|----------------------------------|------------------|------------------------|--------------------------------|------------------------------------------------------------------------------------------------------------------------------------------------------------------------------------------------------------------------------------------------------------------|
| *Leaf Area Index                                 | 1                                | per pft          | <b>lai_&lt;pft&gt;</b> | year                           |                                                                                                                                                                                                                                                                  |
| *Leaf Area Index                                 | 1                                | gridcell average | <b>lai_&lt;pft&gt;</b> | Mon (day)                      |                                                                                                                                                                                                                                                                  |
| *Plant Functional Type<br>Grid Fraction          | %                                | per gridcell     | <b>pft_&lt;pft&gt;</b> | year<br>(or once if<br>static) | The categories may differ from model<br>to model, depending on their PFT<br>definitions. This may include natural<br>PFTs, anthropogenic PFTs, bare soil,<br>lakes, urban areas, etc. Sum of all<br>should equal the fraction of the grid-<br>cell that is land. |
| Hydrological variables                           |                                  |                  |                        |                                |                                                                                                                                                                                                                                                                  |
| Total Evapo-<br>Transpiration                    | $\text{kg m}^{-2} \text{s}^{-1}$ | gridcell total   | <b>evap</b>            | mon (day)                      |                                                                                                                                                                                                                                                                  |
| Evaporation from<br>Canopy<br><br>(interception) | $\text{kg m}^{-2} \text{s}^{-1}$ | gridcell total   | <b>intercep</b>        | mon (day)                      | The canopy evaporation+sublimation<br>(if present in model).                                                                                                                                                                                                     |
| Water Evaporation from<br>Soil                   | $\text{kg m}^{-2} \text{s}^{-1}$ | per gridcell     | <b>esoil</b>           | mon (day)                      | Includes sublimation.                                                                                                                                                                                                                                            |
| Transpiration                                    | $\text{kg m}^{-2} \text{s}^{-1}$ | per gridcell     | <b>trans</b>           | mon (day)                      |                                                                                                                                                                                                                                                                  |
| *Runoff                                          | $\text{kg m}^{-2} \text{s}^{-1}$ | per gridcell     | <b>qtot</b>            | mon (day**)                    | total (surface + subsurface) runoff<br>(qtot = qs + qsb).<br><br>**for models also participating in the                                                                                                                                                          |

|                                      |                                    |              |                      |           |                                                                                                                                                             |
|--------------------------------------|------------------------------------|--------------|----------------------|-----------|-------------------------------------------------------------------------------------------------------------------------------------------------------------|
|                                      |                                    |              |                      |           | <p>water sector</p> <p>If daily resolution not possible, please provide monthly<sup>1</sup>.</p>                                                            |
| *Soil Moisture                       | kg m <sup>-2</sup>                 | per gridcell | <b>soilmoist</b>     | mon (day) | If possible, please provide soil moisture for all depth layers (i.e. 3D-field), and indicate depth in m. Otherwise, provide soil moisture of entire column. |
| Surface Runoff                       | kg m <sup>-2</sup> s <sup>-1</sup> | per gridcell | <b>qs</b>            | mon (day) | The total surface runoff leaving the land portion of the grid cell.                                                                                         |
| *Frozen soil moisture for each layer | kg m <sup>-2</sup>                 | per gridcell | <b>soilmoistfroz</b> | mon       | Please provide soil moisture for all depth levels and indicate depth in m.                                                                                  |
| *Snow depth                          | m                                  | per gridcell | <b>snd</b>           | mon       | Grid cell mean depth of snowpack.                                                                                                                           |
| *Snow water equivalent               | kg m <sup>-2</sup>                 | per gridcell | <b>swe</b>           | mon       | Total water mass of the snowpack (liquid or frozen), averaged over a grid cell.                                                                             |
| *Annual maximum thaw depth           | m                                  | per gridcell | <b>thawdepth</b>     | year      | <p>Calculated from daily thaw depths</p> <p>Please provide for purposes of permafrost sector.</p>                                                           |
| <b>Other outputs</b>                 |                                    |              |                      |           |                                                                                                                                                             |

<sup>1</sup> If storage issues keep you from reporting daily data, please contact the ISIMIP team to discuss potential solutions.

|                      |   |              |                  |           |                                                                                                                                                                                                 |
|----------------------|---|--------------|------------------|-----------|-------------------------------------------------------------------------------------------------------------------------------------------------------------------------------------------------|
| *Temperature of Soil | K | per gridcell | <b>tsl</b>       | day (mon) | Temperature of each soil layer.<br>Reported as "missing" for grid cells occupied entirely by "sea".<br><br>Also needs depths in meters. Daily would be great, but otherwise monthly would work. |
| Burnt Area Fraction  | % | per gridcell | <b>burntarea</b> | mon (day) | fraction of entire grid cell that is covered by burnt vegetation                                                                                                                                |
| Albedo               | - | per gridcell | <b>albedo</b>    | mon       | average of pfts, snow cover, bare ground and water surfaces, range between 0-1                                                                                                                  |

Note: If you cannot provide the data at the temporal or spatial resolution specified, please provide it the highest possible resolution of your model. Please contact the coordination team ([info@isimip.org](mailto:info@isimip.org)) to for any further clarification, or to discuss the equivalent variable in your model.

### 1.3 Regional Forestry

**Table 3** Variables to be reported by forest models. Abbreviations are provided in Table .

| Long name                                                           | units                           |                                           | output variable name                                 | frequency | comment                                                                                              |
|---------------------------------------------------------------------|---------------------------------|-------------------------------------------|------------------------------------------------------|-----------|------------------------------------------------------------------------------------------------------|
| <b>Essential outputs</b>                                            |                                 |                                           |                                                      |           |                                                                                                      |
| Mean DBH                                                            | cm                              | per species and stand total               | <b>dbh_&lt;species/total&gt;</b>                     | year      |                                                                                                      |
| Mean DBH of 100 highest trees                                       | cm                              | stand total                               | <b>dbh_domhei</b>                                    | year      |                                                                                                      |
| Stand Height                                                        | m                               | per species and stand total               | <b>height_&lt;species/total&gt;</b>                  | year      | For models including natural regeneration this variable may not make sense, please report dom_height |
| Dominant Height                                                     | m                               | stand total                               | <b>dom_height</b>                                    | year      | Mean height of the 100 highest trees                                                                 |
| Stand Density                                                       | Trees ha <sup>-1</sup>          | per species and stand total               | <b>density_&lt;species/total&gt;</b>                 | year      |                                                                                                      |
| Basal Area                                                          | m <sup>2</sup> ha <sup>-1</sup> | per species and stand total               | <b>ba_&lt;species/total&gt;</b>                      | year      |                                                                                                      |
| Volume of Dead Trees                                                | m <sup>3</sup> ha <sup>-1</sup> | per species and stand total               | <b>mort_&lt;species/total&gt;</b>                    | year      |                                                                                                      |
| Harvest by dbh-class                                                | m <sup>3</sup> ha <sup>-1</sup> | per species and stand total and dbh-class | <b>harv_&lt;species/total&gt;_&lt;dbhclass&gt;</b>   | year      |                                                                                                      |
| Remaining stem number after disturbance and management by dbh class | Trees ha <sup>-1</sup>          | per species and stand total               | <b>stemno_&lt;species/total&gt;_&lt;dbhclass&gt;</b> | year      | dbhclass_nameas specific in <b>Table</b>                                                             |
| Stand Volume                                                        | m <sup>3</sup> ha <sup>-1</sup> | per species and stand total               | <b>vol_&lt;species/total&gt;</b>                     | year      |                                                                                                      |
| Carbon Mass in Vegetation biomass (incl. Soil veg.?)                | kg C m <sup>-2</sup>            | per species and stand total               | <b>cveg_&lt;species/total&gt;</b>                    | year      |                                                                                                      |
| Carbon Mass in Litter Pool                                          | kg C m <sup>-2</sup>            | per species and stand total               | <b>clitter_&lt;species/total&gt;</b>                 | year      | Info for each individual pool.                                                                       |
| Carbon Mass in Soil Pool                                            | kg C m <sup>-2</sup>            | per species and stand total               | <b>csoil_&lt;species/total&gt;</b>                   | year      | Info for each                                                                                        |

|                                                          |                                  |                             |                                                   |                             |                                                                                                  |
|----------------------------------------------------------|----------------------------------|-----------------------------|---------------------------------------------------|-----------------------------|--------------------------------------------------------------------------------------------------|
|                                                          |                                  |                             |                                                   |                             | individual soil layer                                                                            |
| Tree age by dbh class                                    | yr                               | per species and stand total | <b>age_&lt;species/total&gt;_&lt;dbhclass&gt;</b> | year                        | dbhclass_name as specific in <b>Table</b>                                                        |
| Gross Primary Production                                 | $\text{kg m}^{-2} \text{s}^{-1}$ | per species and stand total | <b>gpp_&lt;species/total&gt;</b>                  | day                         | As $\text{kg carbon} \cdot \text{m}^{-2} \cdot \text{s}^{-1}$                                    |
| Net Primary Production                                   | $\text{kg m}^{-2} \text{s}^{-1}$ | per species and stand total | <b>npp_&lt;species/total&gt;</b>                  | day                         | As $\text{kg carbon} \cdot \text{m}^{-2} \cdot \text{s}^{-1}$                                    |
| Autotrophic (Plant) Respiration                          | $\text{kg m}^{-2} \text{s}^{-1}$ | per species and stand total | <b>ra_&lt;species/total&gt;</b>                   | day                         | As $\text{kg carbon} \cdot \text{m}^{-2} \cdot \text{s}^{-1}$                                    |
| Heterotrophic Respiration                                | $\text{kg m}^{-2} \text{s}^{-1}$ | stand total                 | <b>rh_&lt; total&gt;</b>                          | day                         | As $\text{kg carbon} \cdot \text{m}^{-2} \cdot \text{s}^{-1}$                                    |
| Net Ecosystem Exchange                                   | $\text{kg m}^{-2} \text{s}^{-1}$ | per stand                   | <b>nee_&lt;total&gt;</b>                          | day                         | As $\text{kg carbon} \cdot \text{m}^{-2} \cdot \text{s}^{-1}$                                    |
| Mean Annual Increment                                    | $\text{m}^3 \text{ha}^{-1}$      | per species and stand total | <b>mai_&lt;species/total&gt;</b>                  | year                        |                                                                                                  |
| Fraction of absorbed photosynthetically active radiation | %                                | per species and stand total | <b>fapar_&lt;species/total&gt;</b>                | day                         |                                                                                                  |
| Leaf Area Index                                          | $\text{m}^2 \text{m}^{-2}$       | per species and stand total | <b>lai_&lt;species/total&gt;</b>                  | mon                         |                                                                                                  |
| Species composition                                      | % of basal area                  | per ha                      | <b>species_&lt;species&gt;</b>                    | year<br>(or once if static) | The categories may differ from model to model, depending on their species and stand definitions. |
| Total Evapotranspiration                                 | $\text{kg m}^{-2} \text{s}^{-1}$ | stand total                 | <b>evap_&lt; total&gt;</b>                        | day                         | Sum of transpiration, evaporation, interception and sublimation.<br>(=intercept + esoil + trans) |
| Evaporation from Canopy (interception)                   | $\text{kg m}^{-2} \text{s}^{-1}$ | per species and stand total | <b>intercept_&lt;species/total&gt;</b>            | day                         | the canopy evaporation+ sublimation (if present in model).                                       |

|                                                               |                                   |                             |                                       |      |                                                                                                                                                             |
|---------------------------------------------------------------|-----------------------------------|-----------------------------|---------------------------------------|------|-------------------------------------------------------------------------------------------------------------------------------------------------------------|
| Water Evaporation from Soil                                   | $\text{kg m}^{-2} \text{s}^{-1}$  | per stand                   | esoil                                 | day  | includes sublimation.                                                                                                                                       |
| Transpiration                                                 | $\text{kg m}^{-2} \text{s}^{-1}$  | per species and stand total | trans_<species/total>                 | day  |                                                                                                                                                             |
| Soil Moisture                                                 | $\text{kg m}^{-2}$                | per stand                   | soilmoist                             | day  | If possible, please provide soil moisture for all depth layers (i.e. 3D-field), and indicate depth in m. Otherwise, provide soil moisture of entire column. |
| <b>Optional outputs</b>                                       |                                   |                             |                                       |      |                                                                                                                                                             |
| Removed stem numbers by size class by natural mortality       | Trees $\text{ha}^{-1}$            | per species and stand total | mortstemno_<species/total>_<dbhclass> | year | dbhclass_name as specific in <b>Table</b>                                                                                                                   |
| Removed stem numbers by size class by management              | Trees $\text{ha}^{-1}$            | per species and stand total | harvstemno_<species/total>_<dbhclass> | year | dbhclass_name as specific in <b>Table</b>                                                                                                                   |
| Volume of disturbance damage                                  | $\text{m}^3 \text{ha}^{-1}$       | per species and stand total | dist_<dist_name>                      | year | dist_name as specific in <b>Table</b>                                                                                                                       |
| Nitrogen of annual Litter                                     | $\text{g N m}^{-2} \text{a}^{-1}$ | per species and stand total | nlit_<species/total>                  | year |                                                                                                                                                             |
| Nitrogen in Soil                                              | $\text{g N m}^{-2} \text{a}^{-1}$ | stand total                 | nsoil_<total>                         | year |                                                                                                                                                             |
| Net Primary Production allocated to leaf biomass              | $\text{kg m}^{-2} \text{s}^{-1}$  | per species and stand total | npp_andleaf_<species>                 | day  | As $\text{kg carbon} \cdot \text{m}^{-2} \cdot \text{s}^{-1}$                                                                                               |
| Net Primary Production allocated to fine root biomass         | $\text{kg m}^{-2} \text{s}^{-1}$  | per species and stand total | npp_landroot_<species>                | day  | As $\text{kg carbon} \cdot \text{m}^{-2} \cdot \text{s}^{-1}$                                                                                               |
| Net Primary Production allocated to above ground wood biomass | $\text{kg m}^{-2} \text{s}^{-1}$  | per species and stand total | npp_abovegroundwood_<species>         | day  | As $\text{kg carbon} \cdot \text{m}^{-2} \cdot \text{s}^{-1}$                                                                                               |
| Net Primary Production allocated to below ground              | $\text{kg m}^{-2} \text{s}^{-1}$  | per species and stand total | npp_belowgroundwood_<species>         | day  | As $\text{kg carbon} \cdot \text{m}^{-2} \cdot \text{s}^{-1}$                                                                                               |

|                              |                                  |                             |                                 |      |                                                               |
|------------------------------|----------------------------------|-----------------------------|---------------------------------|------|---------------------------------------------------------------|
| wood biomass                 |                                  |                             |                                 |      |                                                               |
| Root autotrophic respiration | $\text{kg m}^{-2} \text{s}^{-1}$ | per species and stand total | <b>rr_&lt;species/total&gt;</b> | day  | As $\text{kg carbon} \cdot \text{m}^{-2} \cdot \text{s}^{-1}$ |
| Carbon Mass in Leaves        | $\text{kg m}^{-2}$               | per species and stand total | <b>cleaf_&lt;species&gt;</b>    | year |                                                               |
| Carbon Mass in Wood          | $\text{kg m}^{-2}$               | per species and stand total | <b>cwood_&lt;species&gt;</b>    | year | including sapwood and hardwood                                |
| Carbon Mass in Roots         | $\text{kg m}^{-2}$               | per species and stand total | <b>croot_&lt;species&gt;</b>    | year | including fine and coarse roots                               |
| Temperature of Soil          | K                                | per stand                   | <b>tsl</b>                      | day  | Temperature of each soil layer                                |

Note: If you cannot provide the data at the temporal or spatial resolution specified, please provide it the highest possible resolution of your model. Please contact the coordination team ([info@isimip.org](mailto:info@isimip.org)) to for any further clarification, or to discuss the equivalent variable in your model.



**Table 4** Codes for species, disturbance names and dbh classes as used in protocol (species, dist\_name, dbhclass).

| long name            | Short name |
|----------------------|------------|
| Fagus sylvatica      | fasy       |
| Quercus robur        | quro       |
| Quercus petraea      | qupe       |
| Pinus sylvestris     | pisy       |
| Picea abies          | piab       |
| Pinus pinaster       | pipi       |
| Larix decidua        | lade       |
| Acer platanoides     | acpl       |
| Eucalyptus globulus  | eugl       |
| Betula pendula       | bepe       |
| Betula pubescens     | bepu       |
| Robinia pseudoacacia | rops       |
| Fraxinus excelsior   | frex       |
| Populus nigra        | poni       |
| Sorbus aucuparia     | soau       |
| hard woods           | hawo       |
| fire                 | fi         |
| wind                 | wi         |
| insects              | ins        |
| drought              | dr         |
| grazing              | graz       |
| diseases             | dis        |
| DBH_class_0-5*       | dbh_c0     |
| DBH_class_5-10*      | dbh_c5     |
| DBH_class_10-15*     | dbh_c10    |
| DBH_class_15-20*     | dbh_c15    |
| DBH_class_20-25*     | dbh_c20    |
| DBH_class_25-30*     | dbh_c25    |
| DBH_class_30-35*     | dbh_c30    |
| DBH_class_35-40*     | dbh_c35    |
| DBH_class_40-45*     | dbh_c40    |

|                    |          |
|--------------------|----------|
| DBH_class_45-50*   | dbh_c45  |
| DBH_class_50-55*   | dbh_c50  |
| DBH_class_55-60*   | dbh_c55  |
| DBH_class_60-65*   | dbh_c60  |
| DBH_class_65-70*   | dbh_c65  |
| DBH_class_70-75*   | dbh_c70  |
| DBH_class_75-80*   | dbh_c75  |
| DBH_class_80-85*   | dbh_c80  |
| DBH_class_85-90*   | dbh_c85  |
| DBH_class_90-95*   | dbh_c90  |
| DBH_class_95-100*  | dbh_c95  |
| DBH_class_100-105* | dbh_c100 |
| DBH_class_105-110* | dbh_c105 |
| DBH_class_110-115* | dbh_c110 |
| DBH_class_115-120* | dbh_c115 |
| DBH_class_120-125* | dbh_c120 |
| DBH_class_125-130* | dbh_c125 |
| DBH_class_130-135* | dbh_c130 |
| DBH_class_135-140* | dbh_c135 |
| DBH_class_>140*    | dbh_c140 |

\*the boundaries of the dbh classes should be interpreted as follows: dbh\_class\_0-5 = 0 to<5 cm; dbh\_class\_5-10 =5 to<10 cm, etc.... the dbh class dbh\_c140 includes all trees of 140cm dbh and larger.

**Table 5** Business-as-usual management scenarios for the different tree species. Please apply the following generic management guidelines. For past simulations and depending on the model, modellers should use the observed stem numbers from the time series of stand and tree level data to mimick stand management. Future management should then be added according to the generic management guidelines outlined below. E.g., The last management for the Peitz site can be inferred from the tree data is taking place in 2011, hence the next management would then happen in 2026.

| Species   | Thinning regime | Intensity<br>[% of basal area] | Interval<br>[yr] | Stand age for final harvest |
|-----------|-----------------|--------------------------------|------------------|-----------------------------|
| pisy      | below           | 20                             | 15               | 140                         |
| piab      | below           | 30                             | 15               | 120                         |
| fasy      | above           | 30                             | 15               | 140                         |
| quro/qupe | above           | 15                             | 15               | 200                         |
| pipi      | below           | 20                             | 10               | 45                          |

## 1.4 Permafrost

**Table 6** Variables to be reported by permafrost models

| long name                                                                  | units                              |                            | output<br>variable name | frequen<br>cy | comment                                                                                                                                                                                                                          |
|----------------------------------------------------------------------------|------------------------------------|----------------------------|-------------------------|---------------|----------------------------------------------------------------------------------------------------------------------------------------------------------------------------------------------------------------------------------|
| Essential outputs                                                          |                                    |                            |                         |               |                                                                                                                                                                                                                                  |
| Temperature of Soil                                                        | K                                  | per gridcell               | tsl                     | day (mon)     | Temperature of each soil layer. Reported as "missing" for grid cells occupied entirely by "sea". <b>THIS IS THE MOST IMPORTANT VARIABLE.</b> Also need depths in meters. Daily would be great, but otherwise monthly would work. |
| Pools (as Biomes output Table)                                             |                                    |                            |                         |               |                                                                                                                                                                                                                                  |
| Carbon Mass in Vegetation biomass                                          | kg m <sup>-2</sup>                 | per pft and gridcell total | cveg_<pft>              | year          | Gridcell total cveg is essential. Per PFT information is desirable.                                                                                                                                                              |
| Carbon Mass in Litter Pool                                                 | kg m <sup>-2</sup>                 | per pft and gridcell total | clitter_<pft>           | year          |                                                                                                                                                                                                                                  |
| Carbon Mass in Soil Pool                                                   | kg m <sup>-2</sup>                 | per pft and gridcell total | csoil_<pft>             | year          |                                                                                                                                                                                                                                  |
| Fluxes (as Biomes output Table)                                            |                                    |                            |                         |               |                                                                                                                                                                                                                                  |
| Carbon Mass Flux out of atmosphere due to Gross Primary Production on Land | kg m <sup>-2</sup> s <sup>-1</sup> | gridcell total             | gpp                     | mon (day)     | essential                                                                                                                                                                                                                        |

|                                                                                             |                                  |                |                        |              |           |
|---------------------------------------------------------------------------------------------|----------------------------------|----------------|------------------------|--------------|-----------|
| Carbon Mass Flux<br>out of atmosphere<br>due to Gross<br>Primary Production<br>on Land      | $\text{kg m}^{-2} \text{s}^{-1}$ | per pft        | <b>gpp_&lt;pft&gt;</b> | year         | desirable |
| Carbon Mass Flux<br>into atmosphere<br>due to Autotrophic<br>(Plant) Respiration<br>on Land | $\text{kg m}^{-2} \text{s}^{-1}$ | gridcell total | <b>ra</b>              | mon<br>(day) |           |
| Carbon Mass Flux<br>out of atmosphere<br>due to Net Primary<br>Production on Land           | $\text{kg m}^{-2} \text{s}^{-1}$ | gridcell total | <b>npp</b>             | mon<br>(day) | essential |
| Carbon Mass Flux<br>out of atmosphere<br>due to Net Primary<br>Production on Land           | $\text{kg m}^{-2} \text{s}^{-1}$ | per pft        | <b>npp_&lt;pft&gt;</b> | year         | desirable |
| Carbon Mass Flux<br>into atmosphere<br>due to<br>heterotrophic<br>respiration on Land       | $\text{kg m}^{-2} \text{s}^{-1}$ | gridcell total | <b>rh</b>              | mon<br>(day) |           |
| Carbon Mass Flux<br>into atmosphere<br>due to total Carbon<br>emissions from fire           | $\text{kg m}^{-2} \text{s}^{-1}$ | gridcell total | <b>fireint</b>         | mon<br>(day) |           |

|                                                                                                                                  |                                    |                  |                        |                          |                                                                                                                                                                                                                                                |
|----------------------------------------------------------------------------------------------------------------------------------|------------------------------------|------------------|------------------------|--------------------------|------------------------------------------------------------------------------------------------------------------------------------------------------------------------------------------------------------------------------------------------|
| Carbon Mass Flux out of Atmosphere due to Net biome Production on Land (NBP) (please specify if NBP≠NPP+HR+Fire s in your model) | kg m <sup>-2</sup> s <sup>-1</sup> | gridcell total   | <b>ecoatmflux</b>      | mon (day)                | This is the net mass flux of carbon between land and atmosphere calculated as photosynthesis MINUS the sum of plant and soil respiration, carbon fluxes from fire, harvest, grazing and land use change. Positive flux is into the land.       |
| Structure [as Biomes output Table]                                                                                               |                                    |                  |                        |                          |                                                                                                                                                                                                                                                |
| Leaf Area Index                                                                                                                  | 1                                  | per pft          | <b>lai_&lt;pft&gt;</b> | year                     |                                                                                                                                                                                                                                                |
| Leaf Area Index                                                                                                                  | 1                                  | gridcell average | <b>lai_&lt;pft&gt;</b> | Mon (day)                |                                                                                                                                                                                                                                                |
| Plant Functional Type Grid Fraction                                                                                              | %                                  | per gridcell     | <b>pft_&lt;pft&gt;</b> | year (or once if static) | The categories may differ from model to model, depending on their PFT definitions. This may include natural PFTs, anthropogenic PFTs, bare soil, lakes, urban areas, etc.. Sum of all should equal the fraction of the grid-cell that is land. |
| Hydrological variables [as Biomes output Table]                                                                                  |                                    |                  |                        |                          |                                                                                                                                                                                                                                                |
| Runoff                                                                                                                           | kg m <sup>-2</sup> s <sup>-1</sup> | per gridcell     | <b>qtot</b>            | day** (mon)              | total (surface + subsurface) runoff (qtot = qs + qsb). If daily resolution not possible, please provide monthly <sup>2</sup> .<br><br>**For those models also participating in the water simulations                                           |
| Soil moisture                                                                                                                    | kg m <sup>-2</sup>                 | per grid cell    | <b>soilmoist</b>       | mon                      | please provide soil moisture for all depth layers (i.e. 3D-field), and indicate depth in m.<br><br>Please also deliver for the permafrost sector.                                                                                              |

<sup>2</sup> If storage issues keep you from reporting daily data, please contact the ISIMIP team to discuss potential solutions.

|                                     |                    |              |                      |              |                                                                                 |
|-------------------------------------|--------------------|--------------|----------------------|--------------|---------------------------------------------------------------------------------|
| Frozen soil moisture for each layer | kg m <sup>-2</sup> | per gridcell | <b>soilmoistfroz</b> | mon          | Please provide soil moisture for all depth levels and indicate depth in m.      |
| Snow depth                          | m                  | per gridcell | <b>snd</b>           | mon          | Grid cell mean depth of snowpack.                                               |
| Snow water equivalent               | kg m <sup>-2</sup> | per gridcell | <b>swe</b>           | mon          | Total water mass of the snowpack (liquid or frozen), averaged over a grid cell. |
| Annual maximum thaw depth           | m                  | per gridcell | <b>thawdepth</b>     | year         | calculated from daily thaw depths                                               |
| <b>Other outputs</b>                |                    |              |                      |              |                                                                                 |
| Burnt Area Fraction                 | %                  | per gridcell | <b>burntarea</b>     | mon<br>(day) | fraction of entire grid cell that is covered by burnt vegetation                |

## 1.5 Agriculture

**Table 7** Variables to be reported by crop models

| Variable                                                         | Variable name    | Resolution            | Unit                                                 | Comments                                                                                                                                                              |
|------------------------------------------------------------------|------------------|-----------------------|------------------------------------------------------|-----------------------------------------------------------------------------------------------------------------------------------------------------------------------|
| Key model outputs                                                |                  |                       |                                                      |                                                                                                                                                                       |
| Crop yields                                                      | yield_<crop>     | annual<br>(0.5°x0.5°) | dry matter<br>(t ha <sup>-1</sup> yr <sup>-1</sup> ) |                                                                                                                                                                       |
| Irrigation water withdrawal<br>(assuming unlimited water supply) | pirrww_<crop>    | annual<br>(0.5°x0.5°) | mm yr <sup>-1</sup>                                  | <i>Irrigation water withdrawn in case of optimal irrigation (in addition to rainfall), assuming no losses in conveyance and application.</i>                          |
| Key diagnostic variables                                         |                  |                       |                                                      |                                                                                                                                                                       |
| Actual evapotranspiration                                        | aet_<crop>       | annual<br>(0.5°x0.5°) | mm yr <sup>-1</sup>                                  | portion of all water (including rain) that is evapo-transpired, the water amount should be accumulated over the entire growing period ( <b>not</b> the calendar year) |
| Nitrogen application rate                                        | initr_<crop>     | annual<br>(0.5°x0.5°) | kg ha <sup>-1</sup> yr <sup>-1</sup>                 | Total nitrogen application rate. If organic and inorganic amendments are applied, rate should be reported as inorganic nitrogen equivalent (ignoring residues).       |
| Actual planting dates                                            | plant-day_<crop> | annual<br>(0.5°x0.5°) | Day of year                                          | Julian dates                                                                                                                                                          |
| Anthesis dates                                                   | anth-day_<crop>  | annual<br>(0.5°x0.5°) | Days from planting date                              |                                                                                                                                                                       |
| Maturity dates                                                   | maty-day_<crop>  | annual<br>(0.5°x0.5°) | Days from planting date                              |                                                                                                                                                                       |



| Additional output variables (optional) |             |                       |                                                      |                                                                                                             |
|----------------------------------------|-------------|-----------------------|------------------------------------------------------|-------------------------------------------------------------------------------------------------------------|
| Biomass yields                         | biom_<crop> | annual<br>(0.5°x0.5°) | Dry matter<br>(t ha <sup>-1</sup> yr <sup>-1</sup> ) |                                                                                                             |
| Soil carbon emissions                  | sco2_<crop> | annual<br>(0.5°x0.5°) | kg C ha <sup>-1</sup>                                | Ideally should be modeled with realistic land-use history and initial carbon pools. Subject to extra study. |
| Nitrous oxide emissions                | sn2o_<crop> | annual<br>(0.5°x0.5°) | kg N <sub>2</sub> O-N ha <sup>-1</sup>               | Ideally should be modeled with realistic land-use history and initial carbon pools. Subject to extra study. |

## 1.6 Energy

**Table 8** Variables to be reported by energy models

| Variable                   | Variable name | Unit         | Comments                                               |
|----------------------------|---------------|--------------|--------------------------------------------------------|
| Energy Demand              |               |              |                                                        |
| Total energy demand        | ed_tot        | EJ/time step |                                                        |
| Energy demand residential  | ed_res        | EJ/time step |                                                        |
| Energy demand industry     | ed_ind        | EJ/time step |                                                        |
| Energy demand transport    | ed_trans      | EJ/time step |                                                        |
| Energy Supply              |               |              |                                                        |
| Solar power                | p_sol         | EJ/time step |                                                        |
| Wind power                 | p_wind        | EJ/time step |                                                        |
| Gross hydropower           | p_hydgross    | EJ/time step |                                                        |
| Actual hydropower          | p_hydact      | EJ/time step |                                                        |
| Thermoelectric power total | p_therm       | EJ/time step | Including nuclear, biomass, fossil-fueled power plants |
| Biomass production         | prod_biom     | EJ/time step |                                                        |
| Total energy extraction    | extr_tot      | EJ/time step | Sum of coal/shale/gas extraction                       |

| Economics                  |  |             |                                                                              |
|----------------------------|--|-------------|------------------------------------------------------------------------------|
| Primary energy costs       |  | US\$2005/GJ |                                                                              |
| Final energy costs         |  | US\$2005/GJ | Sum of average cost of electricity of all power plant technologies           |
| Solar power costs          |  | US\$2005/GJ |                                                                              |
| Wind power costs           |  | US\$2005/GJ |                                                                              |
| Hydropower costs           |  | US\$2005/GJ |                                                                              |
| Thermoelectric power costs |  | US\$2005/GJ | Sum of average cost of electricity of coal/gas/nuclear/biomass-fueled plants |
| Adaptation costs           |  | US\$2005/GJ |                                                                              |
| Electricity prices         |  | US\$2005/GJ |                                                                              |

## 1.7 Health

**Table 9** Variables to be reported by health models

| Long name                                      | Units            | Variable name   | Spatial resolution        | Comments                                              |
|------------------------------------------------|------------------|-----------------|---------------------------|-------------------------------------------------------|
| Number of deaths attributable to cold          | number of people | an_cold         | Per city/region/grid cell | Temperature below minimum mortality temperature (MMT) |
| Number of deaths attributable to heat          | number of people | an_warm         | Per city/region/grid cell | Temperature above MMT                                 |
| Attributable fraction (cold)                   | %                | af_cold         | Per city/region/grid cell | Temperature below MMT                                 |
| Attributable fraction (heat)                   | %                | af_warm         | Per city/region/grid cell | Temperature above MMT                                 |
| Number of deaths attributable to cold extremes | number of people | an_extreme_cold | Per city/region/grid cell | < 2.5 percentile of daily temperature distribution    |
| Number of deaths attributable to heat extremes | number of people | an_extreme_heat | Per city/region/grid cell | > 97.5 percentile of daily temperature distribution   |
| Attributable fraction (heat extremes)          | %                | af_extreme_heat | Per city/region/grid cell | >97.5 percentile of daily temperature distribution    |
| Attributable fraction (cold extremes)          | %                | af_extreme_cold | Per city/region/grid cell | < 2.5 percentile of daily temperature distribution    |

## 1.8 Infrastructure

**Table 10** Variables to be reported by coastal infrastructure models

| Variable                                         | Variable name | Resolution         | Unit                                                | Comments                                                                                                                             |
|--------------------------------------------------|---------------|--------------------|-----------------------------------------------------|--------------------------------------------------------------------------------------------------------------------------------------|
| Expected number of people flooded annually       | par           | Time resolved grid | thousands/yr (1000 yr <sup>-1</sup> )               | Par = People at risk.                                                                                                                |
| Expected seafood costs                           | seafloodcost  |                    | million dollars/yr (mio 2005US\$ yr <sup>-1</sup> ) | Expected annual damage caused by seafoods                                                                                            |
| Adaptation costs of building and upgrading dikes | seadikecost   |                    | million dollars/yr (mio 2005US\$ yr <sup>-1</sup> ) | Cost for building/upgrading dikes                                                                                                    |
| Adaptation costs of maintaining dikes            | seadikemain   |                    | million dollars/yr (mio 2005US\$ yr <sup>-1</sup> ) | Cost for maintenance of dikes build since the initial year (2000), but not cost for dikes “build” in the initialization of the model |

## 1.9 Fisheries and Marine Ecosystems

**Table 11** Common output variables to be provided by global and regional marine fisheries models.

| Output variable                                                                                  | Variable name | Resolution | Unit (NetCDF format)                               | Comments                                                                 |
|--------------------------------------------------------------------------------------------------|---------------|------------|----------------------------------------------------|--------------------------------------------------------------------------|
| <b>Essential outputs from global and regional models (provide as many as possible)</b>           |               |            |                                                    |                                                                          |
| TOTAL system biomass density                                                                     | tsb           | monthly    | g C m <sup>-2</sup>                                | all primary producers and consumers                                      |
| TOTAL consumer biomass density                                                                   | tcb           | monthly    | g C m <sup>-2</sup>                                | all consumers (trophic level >1, vertebrates and invertebrates)          |
| Biomass density of consumers >10cm                                                               | b10cm         | monthly    | g C m <sup>-2</sup>                                | if L infinity is >10 cm, include in >10 cm class                         |
| Biomass density of consumers >30cm                                                               | b30cm         | monthly    | g C m <sup>-2</sup>                                | if L infinity is >30 cm, include in >30 cm class                         |
| TOTAL Catch (all commercial functional groups / size classes) where fishing included in model    | tc            | monthly    | g wet biomass / m <sup>2</sup> , g m <sup>-2</sup> | catch at sea (commercial landings plus discards, fish and invertebrates) |
| TOTAL Landings (all commercial functional groups / size classes) where fishing included in model | tla           | monthly    | g wet biomass / m <sup>2</sup> , g m <sup>-2</sup> | commercial landings (catch without discards, fish and invertebrates)     |

| Optional output from global and regional models                                    |                   |         |                                                    |                                                                                                                             |
|------------------------------------------------------------------------------------|-------------------|---------|----------------------------------------------------|-----------------------------------------------------------------------------------------------------------------------------|
| Biomass density of commercial species where fishing included in model              | bcom              | monthly | g C m <sup>-2</sup>                                | Discarded species not included (Fish and invertebrates)                                                                     |
| Biomass density (by functional group / size class) where fishing included in model | b-<class>-<group> | monthly | g C m <sup>-2</sup>                                | Provide name of each size class (<class>) and functional group (<group>) used, and provide a definition of each class/group |
| Catch (by functional group / size class) where fishing included in model           | c-<class>-<group> | monthly | g wet biomass / m <sup>2</sup> , g m <sup>-2</sup> | Provide name of each size class (<class>) and functional group (<group>) used, and provide a definition of each class/group |

## 2 Individual contributions to sea level rise

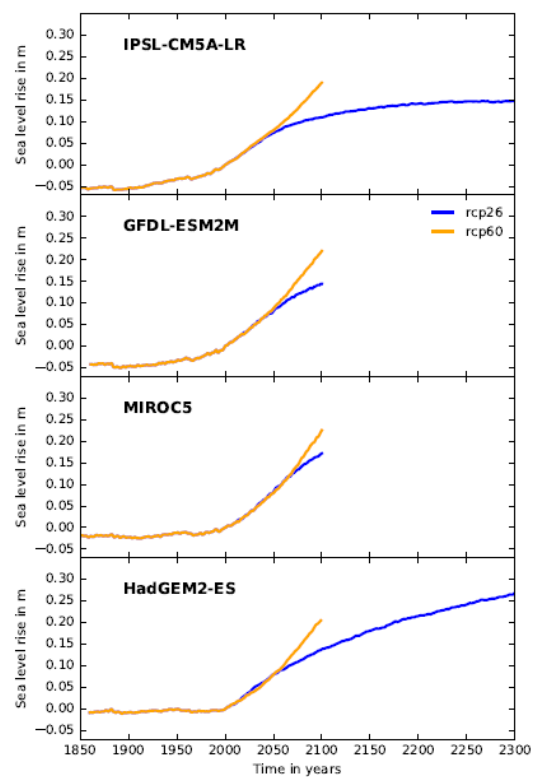

**Figure S1** Time series of sea level rise due to thermal expansion as projected by GFDL-ESM2M (panel 1), HadGEM2-ES (panel 2), IPSL-CM5A-LR (panel 3) and MIROC5 (panel 4) for the historical simulations and RCP2.6 (blue) and RCP6.0 (yellow). All timeseries relative to year 2000.



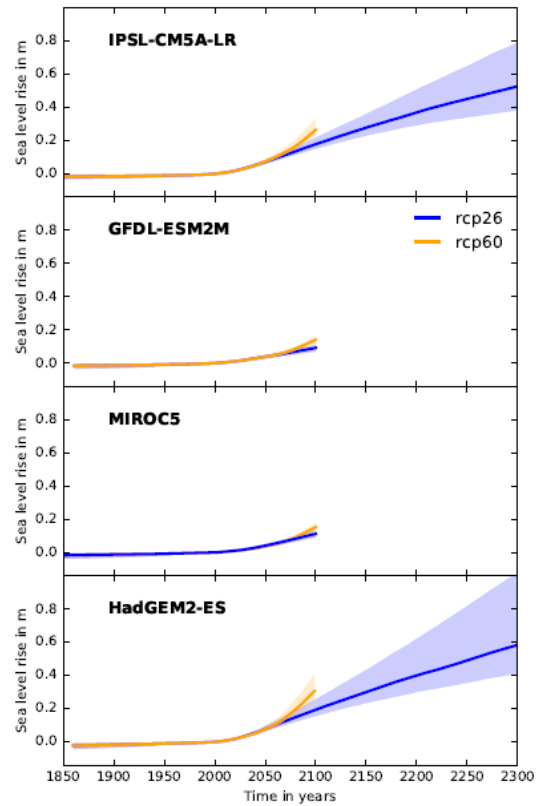

**Figure S2** Time series Greenland's contribution to sea level rise based on global mean temperature change from GFDL-ESM2M (panel 1), HadGEM2-ES (panel 2), IPSL-CM5A-LR (panel 3) and MIROC5 (panel 4). Solid lines: Median projections, shaded areas: uncertainty range between the 5<sup>th</sup> and 95<sup>th</sup> percentile of the distribution. Blue: RCP2.6, yellow: RCP6.0. All timeseries relative to year 2000.

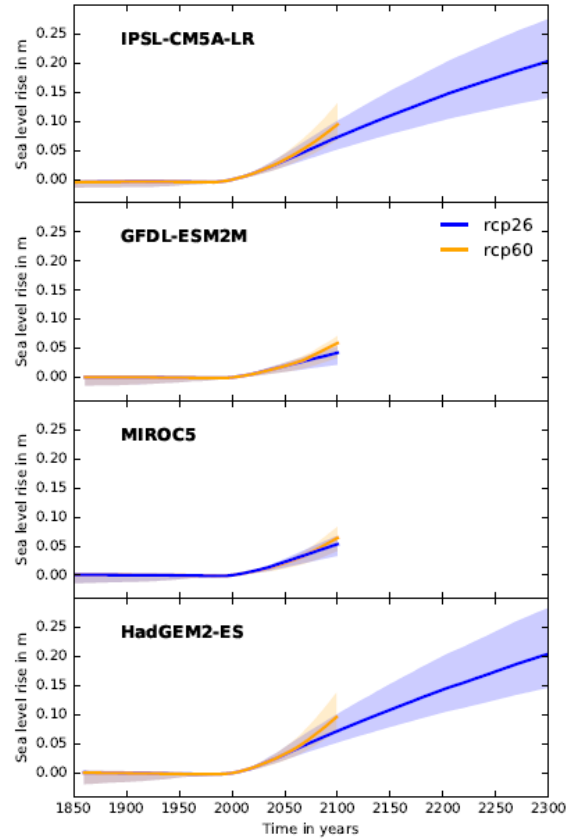

**Figure S3** Time series Antarctica's contribution to sea level rise based on global mean temperature change from GFDL-ESM2M (panel 1), HadGEM2-ES (panel 2), IPSL-CM5A-LR (panel 3) and MIROC5 (panel 4). Solid lines: Median projections, shaded areas: uncertainty range between the 5<sup>th</sup> and 95<sup>th</sup> percentile of the distribution. Blue: RCP2.6, yellow: RCP6.0. All timeseries relative to year 2000.

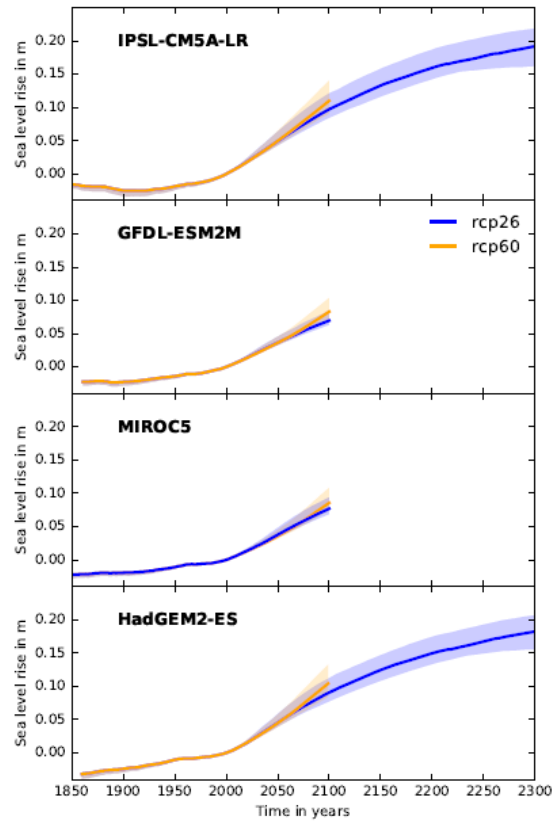

**Figure S4** Time series of the contribution of mountain glaciers to sea level rise based on global mean temperature change from GFDL-ESM2M (panel 1), HadGEM2-ES (panel 2), IPSL-CM5A-LR (panel 3) and MIROC5 (panel 4). Solid lines: Median projections, shaded areas: uncertainty range between the 5<sup>th</sup> and 95<sup>th</sup> percentile of the distribution. Blue: RCP2.6, yellow: RCP6.0. All timeseries relative to year 2000.

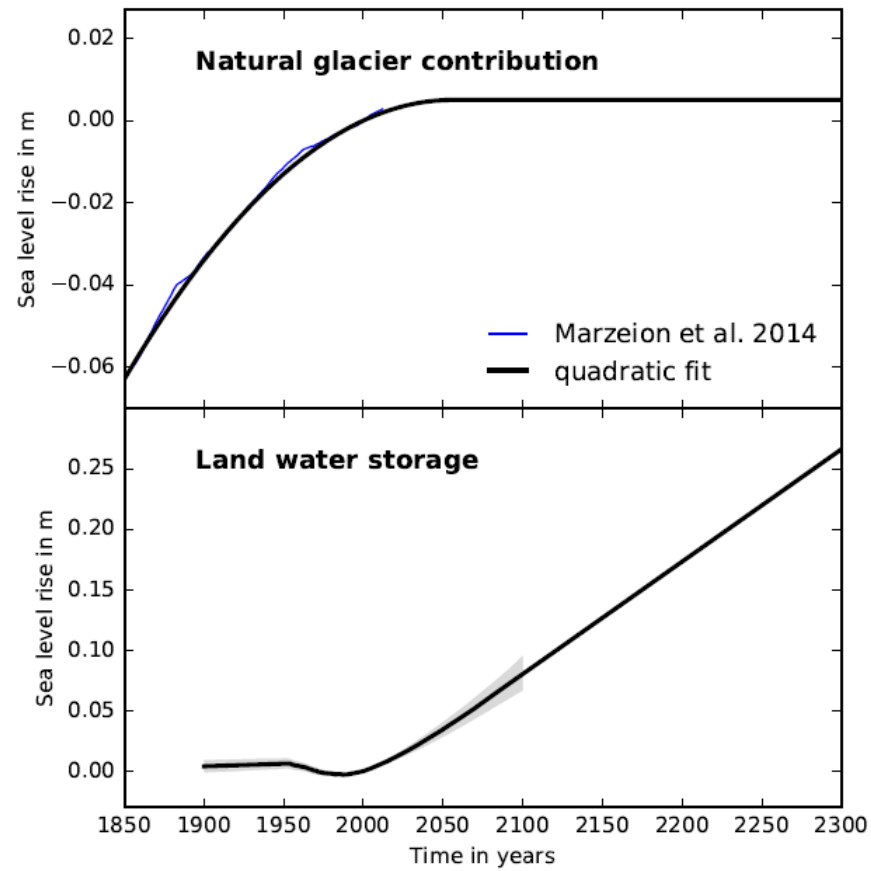

**Figure S5** Sea level contributions that do not depend on current climate change: glaciers (upper panel: blue line as in Marzeion et al., 2014, black line: quadratic fit) and land water storage (Wada et al., 2012, lower panel). The land water storage timeseries is extended beyond 2100 with the 2050-2100 linear trend.

### 3 Derivation of crop-specific land-use and irrigation patterns

The HYDE3.2 land use patterns for the historical period as well as the MAgPIE patterns for the future only provide information on land use at a highly aggregated level while many of the hydrological or biomes models that account for land use changes offer a more specific representation of different crops and therefore also require a more detailed representation of land use patterns as input for their simulations. While LUH2 offers a disaggregation of the historical HYDE3.2 patterns into 5 crop classes ( $C_3$  annual,  $C_3$  nitrogen-fixing,  $C_3$  perennial,  $C_4$  annual,  $C_4$  perennial) many models even need further disaggregation. To allow for an efficient use of the land use information for the historical and future period we i) extend the LUH2 disaggregation into the future based on the MAgPIE projections and ii) provide a further disaggregation of the historical and future agricultural land use categories into the following individual crops

1) maize, 2) oil crops (groundnut), 3) oil crops (rapeseed), 4) oil crops (soybeans), 5) oil crops (sunflower), 6) rice, 7) sugarcane

and crop classes

1) pulses, 2) temperate cereals (incl. wheat), 3) temperate roots, 4) tropical cereals, 5) tropical roots, 6) others annual, 7) others perennial, and 8) others N-fixing.

For all classes we also separate between rainfed and irrigated areas based on the irrigation fraction of total crop land described within HYDE3.2 or projected by MAgPIE.

The disaggregation is done in two steps: 1) From total crop land to the LUH2 categories where the information for the historical period is directly taken from the LUH2 data base (<http://luh.umd.edu/data.shtml>) and 2) from the LUH2 categories to the finer classes based on the harvested areas of 175 crops provided by Monfreda et al. (2008) for the year 2000. In both cases the share  $x_{i,j}$  of a specific class  $C_{i,j}$  (e.g. “annual  $C_3$  crops” in step 1 or “maize” in step 2) in the broader class  $C_i$  (“total crop land” in step 1 or e.g. “ $C_4$  annual”) at each grid cell

$$x_{i,j} = \frac{C_{i,j}}{C_i}$$

is assumed to stay constant over the historical period when disaggregating the HYDE3.2 or LUH2 data or over the future period when disaggregating the MAgPIE projections. For grid cells that contain crop land in the LUH2 or MAgPIE data while they are not covered by crop land in the LUH2 or Monfreda data set we apply a fraction  $x_{i,j}$  that is representative of the country average crop mix the grid cell belongs to.

## References

Marzeion, B., Cogley, J. G., Richter, K. and Parkes, D.: Attribution of global glacier mass loss to anthropogenic and natural causes, *Science* (80-. ), 345(6199), 919–921, doi:10.1126/science.1254702, 2014.

Monfreda, C., Ramankutty, N. and Foley, J. A.: Farming the planet: 2. Geographic distribution of crop areas, yields, physiological types, and net primary production in the year 2000, *Glob. Biogeochem. Cycles*, 22(GB1022), doi:10.1029/2007GB002947., 2008.

Wada, Y., van Beek, L. P. H., Sperna Weiland, F. C., Chao, B. F., Wu, Y.-H. and Bierkens, M. F. P.: Past and future contribution of global groundwater depletion to sea-level rise, *Geophys. Res. Lett.*, 39(9), 1–6, doi:10.1029/2012GL051230, 2012.
